## Measuring functional connectivity with wearable MEG

Elena Boto<sup>1\*</sup>, Ryan M. Hill<sup>1</sup>, Molly Rea<sup>1</sup>, Niall Holmes<sup>1</sup>, Zelekha A. Seedat<sup>1</sup>, James Leggett<sup>1</sup>, Vishal Shah<sup>2</sup>, James Osborne<sup>2</sup>, Richard Bowtell<sup>1</sup> and Matthew J. Brookes<sup>1</sup>

<sup>1</sup>Sir Peter Mansfield Imaging Centre, School of Physics and Astronomy, University of Nottingham, University Park, Nottingham, NG7 2RD, United Kingdom

<sup>2</sup>QuSpin Inc. 331 South 104<sup>th</sup> Street, Suite 130, Louisville, 80027, Colorado, USA

\*Correspondence to:

Dr Elena Boto

Sir Peter Mansfield Imaging Centre  
School of Physics and Astronomy  
University of Nottingham  
University Park  
Nottingham, NG7 2RD

e-mail: [elena.boto@nottingham.ac.uk](mailto:elena.boto@nottingham.ac.uk)

Pages: 33

Words: 10,374

Figures: 7

## Abstract

Optically-pumped magnetometers (OPMs) offer the potential for a step change in magnetoencephalography (MEG) enabling wearable systems that: provide improved data quality; accommodate any subject group; allow data capture during movement and offer a reduction in costs. However, OPM-MEG is still a nascent technology and, to realise its potential, it must be shown to facilitate key neuroscientific measurements, such as the characterisation of human brain networks. Networks, and the connectivities that underlie them, have become a core area of neuroscientific investigation, and their importance is underscored by many demonstrations of their perturbation in brain disorders. Consequently, a demonstration of network measurements via OPM-MEG would be a significant step forward. Here, we aimed to show that a wearable 50-channel OPM-MEG system enables characterisation of the electrophysiological connectome. To this end, we characterise connectivity in the resting state and during a simple visuo-motor task, using both OPM-MEG and a state-of-the-art 275-channel cryogenic MEG device. Our results show that connectome matrices from OPM and cryogenic systems exhibit an extremely high degree of similarity, with correlation values  $>70\%$ . This value is not measurably different to the correlation observed between connectomes measured in different subject groups, on a single scanner. In addition, similar differences in connectivity between individuals (scanned multiple times) were observed in cryogenic and OPM-MEG data, again demonstrating the fidelity of OPM-MEG data. This demonstration shows that a nascent OPM-MEG system offers results similar to a cryogenic device, even despite having  $\sim 5$  times fewer sensors. This adds weight to the argument that OPMs will ultimately supersede cryogenic sensors for MEG measurement.

## Keywords

Optically-pumped magnetometer; OPM; Magnetoencephalography; MEG; OPM-MEG; functional connectivity; network, wearable MEG; amplitude-envelope correlation; AEC

## 1 Introduction

Since its inception, functional neuroimaging has made many important contributions to our understanding of brain function, and one of the most significant is the discovery of brain networks. A network is found when a statistical relationship between neuroimaging signals, derived from spatially separate brain regions, is shown to exist. Such a relationship is termed functional connectivity. The first measurements of functional connectivity used functional magnetic resonance imaging (fMRI; Biswal et al., (1995)) to measure correlation between blood-oxygenated-level-dependent (BOLD) time courses from left and right motor cortex, in the absence of a task (in the so-called resting state). Following this, many fMRI studies (e.g. (Beckmann et al., 2005; Fox and Raichle, 2007; Smith et al., 2009)) focused on identifying other resting-state networks (RSNs); some associated with sensory processing (e.g. auditory or visual networks) and others with attention and cognition (e.g. the default-mode and dorsal-attention networks). Raichle, (2009) described this era of functional imaging as a «paradigm shift». Indeed, study of RSNs offers a powerful means to investigate healthy function, and dysfunction in a wide range of disorders, including schizophrenia, depression, anxiety and dementia (Menon, 2011).

Most functional connectivity studies have been based on fMRI. However, the BOLD signal is an indirect metric of function, based on haemodynamics, which leads to significant disadvantages: for example, Bright and colleagues (Bright et al., 2020) showed an overlap between neural and vascular network components and this makes the interpretation of fMRI networks challenging without first understanding network-specific vascular architecture. In addition, whilst fMRI exhibits exquisite spatial resolution (~1 mm accuracy), it has extremely limited temporal resolution due to the latency and longevity of the haemodynamic response. This means that the timescale of a functional connectivity measurement is limited, and so it is challenging to probe the formation and dissolution of functional networks on a time scale relevant to cognition (Hutchison et al., 2013). For these reasons, a move towards electrophysiological imaging techniques (which exhibit significantly better temporal resolution) for the characterisation of network connectivity is extremely important.

Magnetoencephalography (MEG; Cohen, (1972)) measures the magnetic fields generated outside the head by current flow through neuronal assemblies in the brain. In this way, it offers a means to bypass haemodynamics and infer directly the electrophysiological connectome. MEG data (like all electrophysiological data) are dominated by “neural oscillations” (synchronised rhythmic electrical activity across neurons) in the 1–200 Hz frequency range. Emerging evidence suggests that these oscillations mediate (at least in part) network formation and consequently their measurement offers an exciting means to probe

intrinsic network coupling (Engel et al., 2013). MEG has been successfully used to measure functional connectivity in many studies (e.g. (Baker et al., 2014; Brookes et al., 2012, 2011; Gross et al., 2001; Hipp et al., 2012; Luckhoo et al., 2012; O'Neill et al., 2015)). Networks similar to those seen with fMRI have been and the excellent temporal resolution that MEG affords enables measurement of dynamic connectivity. Indeed, recent studies show that canonical networks modulate on the time scale of seconds (O'Neill et al., 2015) and even milliseconds (Baker et al., 2014). More recently, Seedat et al., (2020) suggested the involvement of extremely short (e.g. ~300 ms) punctate events in driving canonical network connectivity, further underscoring the importance of temporal precision in the characterisation of the human connectome.

A combination of high spatial and temporal accuracy means that MEG offers arguably the best means to measure functional connectivity and the networks that it underpins. However, existing MEG systems have huge limitations: the sensors that form the basic building block of MEG systems (superconducting quantum interference devices; SQUIDs) operate at cryogenic temperatures. These sensors must therefore be fixed in position within a cryogenic dewar, making systems large, cumbersome, and “one-size-fits-all” – i.e. they cannot adapt to different head shapes or sizes. This results in inhomogeneous and sometimes poor brain coverage (particularly in infants). Even if the head is well fitted to a MEG system, the gap between the scalp and the sensors that is needed for thermal insulation reduces sensitivity. The fixed nature of the sensors means that any head movement during data acquisition significantly reduces data quality. Subjects must therefore remain extremely still, which makes the environment poorly tolerated by many groups, including children. Finally, the cryogenic infrastructure and complex electronics makes systems expensive. These factors have, to date, limited the uptake of MEG as a neuroimaging modality, and if MEG-based connectome measures are to realise their potential for neuroscientific discovery and clinical translation, then new types of MEG technology will be required.

Recent advances in quantum technology have led to the development of a new type of magnetic field sensor. Optically-pumped magnetometers (OPMs) offer measurement of magnetic field with a similar sensitivity to the cryogenic sensors used in conventional MEG, however they do not require cooling. Furthermore, they are very small, and lightweight. This has led a number of groups to begin to fabricate OPM-based MEG devices. Suitability of OPMs to capture neuromagnetic signals has been well documented (e.g. (Barry et al., 2019; Borna et al., 2020; Boto et al., 2017; Iivanainen et al., 2019; Johnson et al., 2013; Kamada et al., 2015; Kim et al., 2014; Roberts et al., 2019; Sander et al., 2012; Tierney et al., 2018; Xia et al., 2006) and more recently their lightweight nature has been exploited to develop

“wearable” systems in which (if background fields are controlled appropriately) subjects can move their head freely during data acquisition (Boto et al., 2018). OPM arrays are beginning to be developed with up to 50 sensors surrounding the head (Hill et al., 2020) and there is a growing argument that these devices – which are also cheaper than conventional MEG – will ultimately supersede the current generation of MEG scanners. However, OPM-MEG remains a nascent technology and if the functional neuroimaging field is to gain confidence in it, OPM-based systems must be able to do everything a SQUID system can do. Given the importance of functional connectivity, demonstration of its measurement with OPM systems is a vital step.

There are a number of reasons why functional connectivity is a challenge for OPM-MEG. Firstly, most OPM experimental demonstrations have targeted specific brain regions due to a relatively low sensor count. Given that networks are distributed across the whole brain, coverage that rivals conventional MEG is required. Secondly, networks are highly spatially-specific and their measurement consequently relies on good spatial resolution; if an OPM system is to characterise these networks then it must also offer similar or better spatial specificity to conventional MEG scanners. (At present, this would mean achieving similar spatial resolution with around 50, rather than ~300 sensors). Finally, functional connectivity is heavily reliant on high quality data since, unlike task-based studies where data can be averaged over many trials (and thus artefacts will often be averaged out) functional connectivity must be measured using unaveraged data. This latter point is amplified since unlike conventional MEG systems which often rely on a gradiometer formulation to reduce environmental interference, OPMs are naturally formed as magnetometers. This, at least in principle, increases the effect of external interference, both from environmental (e.g. lab equipment) and biological sources (e.g. the heart).

In this paper, we aim to test whether a 50-channel OPM-MEG system can successfully measure the functional connectome. We measure connectivity during a simple motor task, and in the resting state, and in both cases we compare our findings to those generated using a 275-channel cryogenic system (which for the purposes of this study will be treated as a “gold standard”).

## 2 Methods

### 2.1 OPM-MEG system

The wearable OPM-MEG device used in this study has been developed at the Sir Peter Mansfield Imaging centre, University of Nottingham, and was described recently in Hill et al., (2020). A schematic of the system is shown in Figure 1a: the OPM-MEG suite contains

a magnetically-shielded room (MSR), who's design has been optimised for OPM operation (MuRoom, Magnetic Shields Ltd. Kent, UK). This MSR provides a remnant magnetic field magnitude  $<2$  nT and  $<2$  nT/m magnetic field gradient following a demagnetisation procedure (Altarev et al., 2015). These fields are significantly lower than those found in MSRs which do not feature demagnetisation coils.

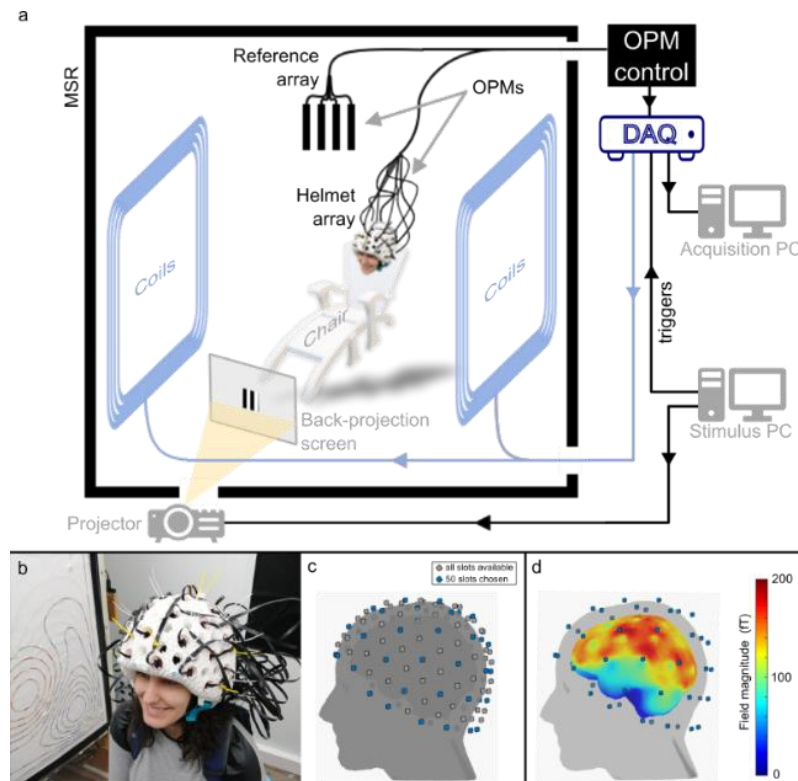

**Figure 1: The OPM-MEG system.** a) Schematic of the OPM-MEG suite. b) Photograph of subject wearing an additively-manufactured helmet with 50 OPM sensors mounted within it. c) Digitised head surface for an example participant, showing the 133 slots available in the helmet (grey) and the 50 chosen for this study (blue). Note that OPMs were made sensitive to the field in the radial direction only. d) Cortical coverage achieved by the selected 50 OPM locations: the norm of the forward fields across all sensors is plotted at each vertex of the brain surface.

Inside the MSR, the participant sits in a non-magnetic chair, and wears an additively manufactured rigid helmet in which 50 OPMs (Gen-2 zero-field magnetometers, QuSpin Inc., (Osborne et al., 2018)) are mounted (see photograph in Figure 1b). The helmet contains a total of 133 possible slots where OPMs can be placed (grey dots in Figure 1c), and for the study described in this manuscript, we chose 50 locations to provide whole-head coverage (blue dots). The OPMs themselves were configured to measure the radial component of magnetic field. Figure 1d shows the cortical coverage achieved with 50 radial OPMs placed in the slots shown in blue: for each vertex of the brain surface, the colour represents the norm of the field (across all sensors) produced by a current dipole located at that vertex. (Dipoles were oriented in two orthogonal tangential directions, and the result is taken to be the average of the two lead field norms.) Note that reasonable

coverage of the whole cortex is achievable, although sensitivity to the temporal pole is somewhat diminished (a problem also found in conventional MEG devices).

Further reduction of background fields is achieved with a set of bi-planar coils (Holmes et al., 2018) positioned at either side of the participant, coupled to an OPM reference array placed behind the subject's head. The remnant static magnetic field and its spatial variation inside the MSR is estimated by the reference array, and an equal and opposite field applied by the coils in order to effect field cancellation. This reduces the remnant field, better enabling OPM operation, minimising any artefact caused by the subject moving their head (and consequently the sensors) through the background field.

The OPMs themselves have been described previously and a complete description will not be repeated here (see e.g. Tierney et al., (2019) or Boto et al., (2020) for a review). Note that they are controlled via a computer located outside the MSR, and analogue output signals directly proportional to local magnetic field, are fed into a National Instruments (Austin, TX, USA) Digital Acquisition unit (DAQ), digitised, and recorded. A separate computer is coupled to stimuli delivery systems, and sends triggers to the DAQ which are synchronously recorded with the MEG data.

## 2.2 OPM Co-registration

In order to enable source localisation, accurate knowledge of the sensor locations and orientations relative to the brain is required. This was provided by a 3-dimensional optical imaging system (structure IO camera (Occipital Inc., San Francisco, CA, USA) coupled to an Apple iPad, operating with Skanect Pro software) and an anatomical MRI scan (Hill et al., 2020; Homölle and Oostenveld, 2019; Zetter et al., 2019). The anatomical MRI was recorded using a 3 T Philips Ingenia MRI system, running an MPRAGE sequence, at an isotropic spatial resolution of 1 mm. The locations and orientations of the sensor casings with respect to the helmet are known *a-priori* from the additive manufacturing process, and the co-registration procedure was used to map the helmet on to the head. This was done in two stages. First, 6 coloured markers were placed at known locations on the helmet, with a further 4 on the participant's face. The camera, coupled with a colour-thresholding algorithm, was used to map the relative locations of these markers, allowing mapping of the helmet to the face. Following this, the helmet was removed and the participant was asked to wear a swimming cap (to flatten their hair). A second digitisation was then acquired measuring the positions of the markers on the face, relative to the rest of the head surface. The head surface was then fitted to the equivalent surface extracted from the anatomical MRI scan. Combining two transforms (helmet-to-head and head-to-MRI)



we were able to effect a complete co-registration of sensor casing to brain anatomy. The location of the sensitive cell within the OPM casing was accounted for and we assumed that the sensitive axis was radial, and parallel to the external sensor housing.

## 2.3 Task-based connectivity experiment

### 2.3.1 Paradigm and data acquisition

Two subjects undertook a visuo-motor task. The task comprised presentation of a centrally-presented, inward-moving, maximum-contrast circular grating (Hoogenboom et al., 2006; Iivanainen et al., 2019), which is known to increase gamma oscillations in the visual cortex. Whilst the visual stimulus was on the screen, participants were asked to perform continuous abductions of their right index finger; a task known to modulate beta oscillations in sensorimotor cortex. The grating was presented for either 1.6, 1.7 or 1.9 s. Each trial ended with a 3-s baseline period, and 100 trials were recorded.

Both participants were scanned six times in the OPM-MEG system and six times in a cryogenic MEG instrument (CTF, Coquitlam, BC, Canada). The study was approved by the University of Nottingham Medical School Research Ethics committee.

OPM data were acquired using a sampling frequency of 1,200 Hz. 42 and 49 OPM sensors were available for participants 1 and 2, respectively. The visual stimulus was back projected onto a screen placed ~85 cm in front of the participant's head. A separate co-registration procedure was performed after each experiment.

Cryogenic MEG data were acquired using a 275-channel CTF system, operating in 3<sup>rd</sup>-order gradiometer configuration, at a sampling frequency of 600 Hz. The stimulus was presented on a back-projection screen placed 95 cm in front of the participant (note that the stimulus was matched for visual angle between the two scanner types). Three head-position indicator (HPI) coils were placed on the participant's head at three fiducial locations (nasion, left and right pre-auricular points). Continuous tracking of the head was achieved via these coils, which were periodically energised during acquisition. A 3D digitiser (Polhemus) was used to measure the locations of the fiducial markers relative to the head surface, prior to each experiment. By matching the participant's digitised head surface with the equivalent surface extracted from their anatomical MRI, co-registration of the fiducial markers, and consequently the MEG sensor geometry, to the individual's brain anatomy was achieved.



### 2.3.2 Data analysis

All MEG data (OPM and cryogenic) were bandpass filtered between [8–80] Hz and epoched into trials. “Bad” trials were removed in cases where the standard deviation of the signal was greater than 3 times the average standard deviation across all trials. This procedure was carried out independently for each channel. Data were then concatenated into a single signal per channel.

Both cryogenic and OPM data were analysed in the same way: functional connectivity was calculated between 78 discrete cortical regions, defined based on the automated anatomical labelling (AAL) atlas (Tzourio-Mazoyer et al., 2002). A scalar beamformer was used to obtain a single electrophysiological time course representative of each region (i.e. a ‘virtual electrode’ placed at the centre of mass of each region). The data covariance matrix was computed in the 8–80 Hz frequency range for a time window spanning the whole experiment. Regularisation was not applied, to maximise spatial resolution (Brookes et al., 2008). The forward model was based on a single sphere for the OPM system and multiple local spheres for the cryogenic system.

After beamforming, regional signals were frequency-filtered to the alpha (8–13 Hz), beta (13–30 Hz), and gamma (52–80 Hz) frequency bands, and epoched into trials. Pairwise orthogonalization (Brookes et al., 2012; Hipp et al., 2012) was used to mitigate the problem of signal leakage between AAL regions (itself a result of the ill-posed MEG inverse problem). Following this, the absolute value of the Hilbert transform of the frequency filtered data was computed to generate the amplitude envelope of oscillatory signals, which was then down-sampled to 10 Hz. Pearson correlation was calculated between amplitude signals for all possible AAL region pairs and averaged over trials. For each participant, each experiment and each frequency band, this procedure resulted in a single 78 x 78 adjacency matrix (or connectome) representing whole-brain connectivity. Finally, connectivity matrices were averaged across experimental runs.

OPM and cryogenic results in the beta band were compared. (Note we chose the beta band as this range has been shown to provide robust brain network measurements (e.g. (Hunt et al., 2016))). Comparisons were made in two ways:

- **Within- and across-subject correlation:** To quantitatively compare connectivity matrices between MEG systems, we first vectorised the matrices from all experimental runs. For each subject, the 6 OPM runs and 6 cryogenic runs were

paired (randomly) and Pearson correlation between the vectorised adjacency matrices was calculated, and averaged. In this way, we obtained a within-subject correlation between OPM-derived and cryogenic-derived connectivity matrices. We also performed the same calculation between subjects (e.g. correlating connectivity from subject 1's cryogenic data and subject 2's OPM data). We hypothesised that there would be individual differences in the connectivity matrices between subject 1 and subject 2, and that these differences would be maintained across the two scanner types (i.e. colloquially, 'the scanner would know who it was scanning'). Consequently, we hypothesised that correlation values would be higher within subject than between subject. A Wilcoxon sign rank test was performed to assess statistical significance.

- **Connectivity strength:** We calculated the linear sum of elements within each connectivity matrix, in one direction; this resulted in 78 regional values of connectivity strength (i.e. for each of the AAL regions, this metric represents the strength of the connection between that region and all other regions in the AAL atlas). Connectivity strength was separately calculated for each subject, MEG system, and experimental run. Again, we wished to probe whether individual differences in connectivity strength were maintained across the two MEG systems. To this end, for each of the 78 regions, a t-test was used to determine the statistical significance of differences between subjects. These calculations were performed for each scanner type separately and multiple comparisons (across the 78 regions) were controlled using the Benjamini-Hochberg procedure (Benjamini and Hochberg, 1995). We hypothesised that any regions where a significant between-subject difference occurred, would be matched across scanner types.

## 2.4 Resting-state connectivity experiment

### 2.4.1 Paradigm and data acquisition

Seven subjects (2 females, mean age  $25.86 \pm 4.30$ ) took part in the resting-state study. All participants gave written informed consent, and the study was approved by the University of Nottingham Medical School Research Ethics Committee.

Seven minutes of eyes-open, resting-state MEG data were acquired using the wearable OPM-MEG system at a sampling frequency of 1,200 Hz. Participants were asked to fixate on a small red cross which was centrally positioned on a grey background on the back-projection screen. Apart from this, they were simply asked to

relax and do nothing. Participants were free to move during the recording, but they were not encouraged to do so. Co-registration was performed (as described above) at the end of each experiment, and MRI's were available for all participants.

For comparison, we employed eyes-open resting-state data which had been acquired previously, in 63 subjects as part of the United Kingdom MEG Partnership (UKMP; (Hunt et al., 2016)) programme. These data were all acquired using the same 275-channel cryogenic MEG system used in our task-based study. The system was operated in third-order synthetic gradiometer configuration, and data were acquired at a sampling frequency of 1,200 Hz. The paradigm comprised a 5-min recording during which participants focused on a small, centrally-positioned red circle, back-projected onto a screen. Head position monitoring was facilitated via three head-position indicator coils which were energised during the scan. Co-registration of MEG sensor geometry to individual brain anatomy was achieved via head shape digitisation.

#### 2.4.2 Data analysis

Data were band-pass filtered between 8 and 80 Hz, and bad channels were discarded based on visual inspection. This meant there were OPM data from 49, 47, 47, 48, 47, 48 and 45 channels for subjects 1–7, respectively.

OPM and cryogenic data were processed in the same way. A scalar beamformer was employed to reconstruct a representative signal at the centre of mass of each of the 78 AAL regions. Data covariance was computed in the 8–80 Hz frequency band and within a time window encompassing the complete resting state recording. Regularisation was not used (see also appendix). Following this, regional signals were frequency-filtered into the alpha (8–13 Hz) and beta (13–30 Hz) bands, and pairwise orthogonalisation used to mitigate signal leakage. The absolute value of the analytic signal was computed for each regional time course, to generate the amplitude envelope of oscillatory signals, which was then down-sampled to 5 Hz. Pearson correlation was calculated between envelopes for each region pair. For each participant and frequency band, this resulted in a single connectivity matrix representing whole-brain connectivity. Group connectivity matrices were computed by averaging across subjects.

We aimed to show that OPM derived connectivity was similar to connectivity derived using a cryogenic instrument and to this end we exploited the large UKMP dataset. We randomly grouped the cryogenic derived connectivity matrices from our

63 subjects into 9 groups, with 7 subjects per group. For each frequency band, we computed a group average connectivity matrix. This resulted in nine matrices derived from cryogenic data which we could compare with the single average (also of 7 subjects) derived from our OPM system.

Quantitative comparison was made by correlating the vectorised connectivity matrices. For each frequency band, we first derived correlations between the OPM group average, and each of the nine cryogenic matrices. For comparison, we then measured correlation, in the same way between all possible pairs of cryogenic-derived connectivity matrices (i.e. group 1 to group 2; group 1 to group 3 etc.). This yields a total of 36 correlation values showing how different, randomly selected, groups compare in terms of their whole brain connectome. We reasoned that if OPM-derived connectivity was significantly different to cryogenic-derived connectivity then we would expect OPM-to-cryogenic correlation to be lower than cryogenic-to-cryogenic. Obviously these 36 values are not statistically independent quantities. For this reason, to test this statistically, we randomly selected 9 independent comparisons from our 36 group pairings, and, via a Wilcoxon sign rank test, we tested for a significant difference between these 9 values (which represent cryogenic-cryogenic group similarity), and the equivalent 9 OPM-cryogenic correlation values.

### 3 Results

#### 3.1 Task-based connectivity

Figure 2 shows results from our task-based connectivity study. For each participant, connectivity matrices obtained from OPM and cryogenic data averaged across six experimental runs, are shown. The left panel shows results in the alpha band, the middle panel shows beta band and the right panel shows gamma band. Colour indicates connectivity values. The inset 3D brain plots show the dominant connections between AAL regions (represented by the red lines) that lie within 35 %, 45 % and 45 % of the maximum connectivity value in alpha, beta and gamma, respectively. Clear differences in network structure can be seen between the three bands: the alpha-connectome is predominantly occipital, although subject 1 shows some parietal connections; the beta band shows primarily parietal (bilateral sensorimotor) connections. Anecdotally, we note a more unilateral network in subject 1 and a bilateral network in subject 2. Finally, the gamma-band connectome is dominated by occipital connections. Similarities between OPM- and cryogenic-derived matrices are clear, a good example being the agreement on inter-individual differences that are shown in the beta band.

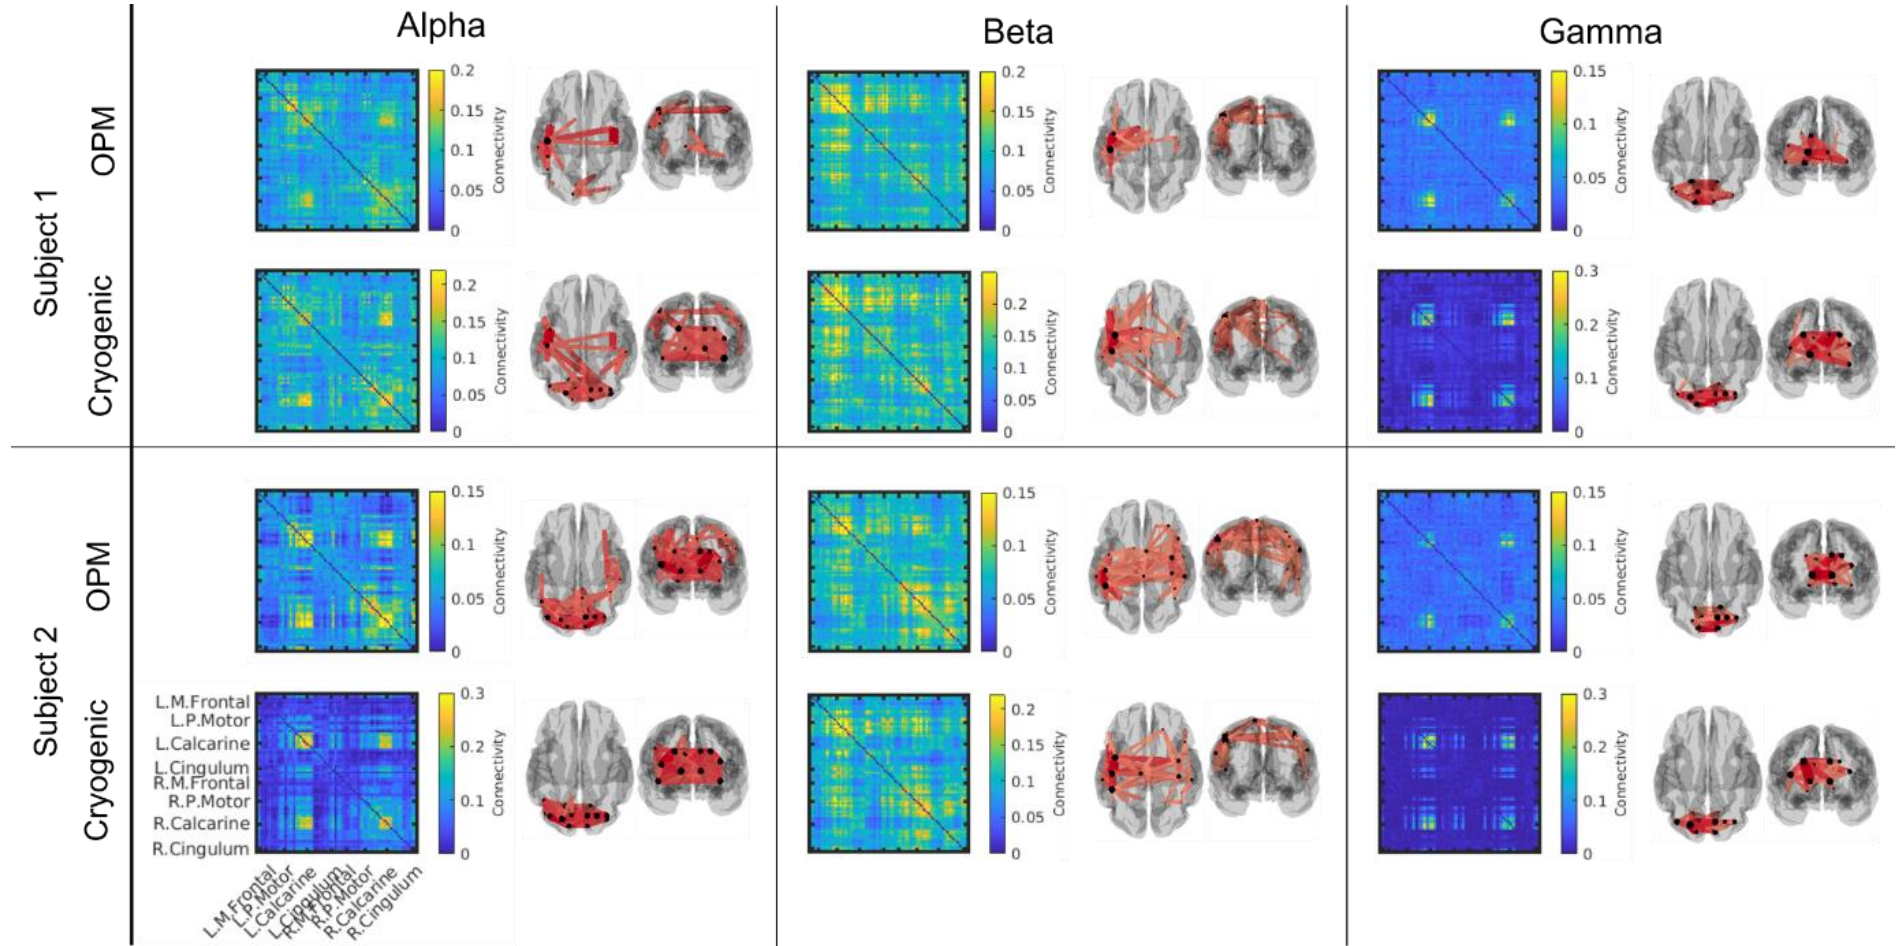

1

2 **Figure 2: Task-based functional connectivity matrices.** Average connectivity matrices (across 6 runs) in the alpha (left), beta (middle) and gamma (right) bands for participants  
 3 1 (top) and 2 (bottom). For each participant, both OPM-derived (top) and cryogenic-derived (bottom) matrices are shown. Colour bars show Pearson correlation values. Alongside  
 4 the matrices, the 3D brains show dominant connections (within 35 % (alpha), 45 % (beta) and 45 % (gamma) of the maximum value).



1           Figure 3 probes the similarity of connectome matrices, within- and between-subjects,  
2           in OPM and cryogenic recordings. Comparison is made in the beta band only. In panel a,  
3           scatter plots show OPM-derived connectivity values for all region pairs, plotted against the  
4           equivalent cryogenic-derived connectivity values i.e. each point on the graph represents a  
5           measured connection, and assuming OPMs and cryogenic sensors measure the same  
6           connectivities, in the same subject, we would expect to see a linear relationship. Plots on  
7           the left show a within-subject comparison: the top scatter plot, in blue, corresponds to  
8           subject 1 and the bottom plot, in yellow, corresponds to subject 2. The scatter plots on the  
9           right compare connectivity matrices between subjects. Note that to generate these plots,  
10          we have randomly paired and overlaid OPM and cryogenic runs. (e.g. OPM run 1 plotted  
11          against cryogenic run 3; OPM run 2 plotted cryogenic run 5, and so on; 6 independent  
12          comparisons are overlaid). A line of best fit is also added and the dotted line shows ' $y =$   
13           $x$ '.

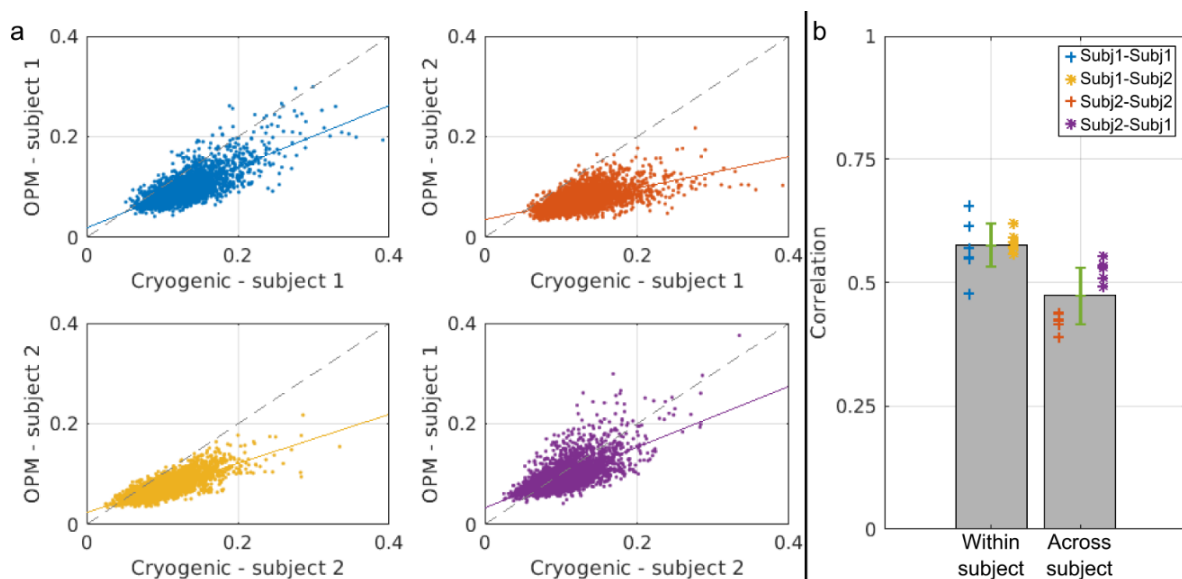

14  
15 **Figure 3: Cryogenic vs OPM connectivity in the beta band.** a) Scatter plots showing connectivity values derived  
16 from cryogenic data plotted against connectivity values derived from OPM data (each 'dot' depicts a measured  
17 connection). Left column shows within-subject correlation for subject 1 (top) and subject 2 (bottom). Right column  
18 corresponds to between-subject correlation: b) Bar plot showing the mean within- and between-subject correlation  
19 values. Error bar corresponds to standard deviation across the 6 comparisons. Crosses and stars indicate  
20 individual values.

21           Note first that a clear linear relationship is observed, demonstrating that OPM- and  
22           cryogenic-derived connectivity matrices are similar in structure. Note also that within-  
23           subject correlation (left-hand scatter plots) appears tighter than between-subject  
24           correlation (right-hand scatter plots). The bar chart in Figure 3b directly illustrates this  
25           point. The bar chart shows mean within-subject correlation ( $0.58 \pm 0.04$ ) and between  
26           subject correlation ( $0.48 \pm 0.07$ ). Error bars correspond to standard deviation. The crosses

1 and stars show the data that contribute to these averages. The blue crosses show  
2 correlation between OPM and cryogenic connectomes, within subject 1; the yellow stars  
3 show the same thing, for subject 2. Red crosses show the subject 1 OPM connectome  
4 versus the subject 2 cryogenic connectome; purple stars show the subject 2 OPM  
5 connectome versus the subject 1 cryogenic connectome. Within-subject correlation was  
6 significantly ( $p = 0.031$ ) higher than between-subject correlation, lending support to our  
7 hypothesis that individual differences between subjects have been replicated in  
8 measurements made using the two types of scanner.

9 Results of our connectivity strength analysis are shown in Figure 4. Panel (a) shows  
10 line plots depicting normalised connectivity strength from the cryogenic- (red) and OPM-  
11 derived (blue) beta-band connectome, for subject 1 (top) and 2 (bottom). On the x-axis  
12 each of the AAL regions are represented. Thick lines correspond to the average  
13 connectivity strength and shaded areas represent standard deviation, across all six runs.  
14 There are clear similarities between the cryogenic- and OPM-derived values: firstly, the  
15 regions with highest values correspond to sensorimotor areas (which is to be expected  
16 given the task). Secondly, both scanners show a clear difference between subjects around  
17 the right motor regions. This is better visualised in Figure 4b, where the normalised  
18 connectivity strength is plotted on a 3D brain. Cryogenic results are at the top, OPM results  
19 at the bottom, left panels correspond to subject 1 and right panels to subject 2. For each  
20 subject, both cryogenic and OPM data yield very similar connectivity strength patterns  
21 Again, subject 1 exhibits a more unilateral beta-band connectome, as opposed to subject  
22 2, in which a clear bilateral network can be observed. Panel (c) shows the same data as  
23 in panel (a) but grouped by scanner type: OPM at the top, cryogenic at the bottom. In both  
24 plots, subject 1 is represented with a solid line and subject 2 with dashed line. Here, the  
25 difference in connectivity strength between both participants around the right sensorimotor  
26 areas can be seen clearly. Figure 4d shows brain regions whose connectivity strength  
27 differed significantly ( $p < 0.05$  corrected) between subjects. Both cryogenic (bottom) and  
28 OPM (top) data highlight similar regions – in particular right sensorimotor cortices and  
29 premotor areas stretching forward to the frontal lobe.

---



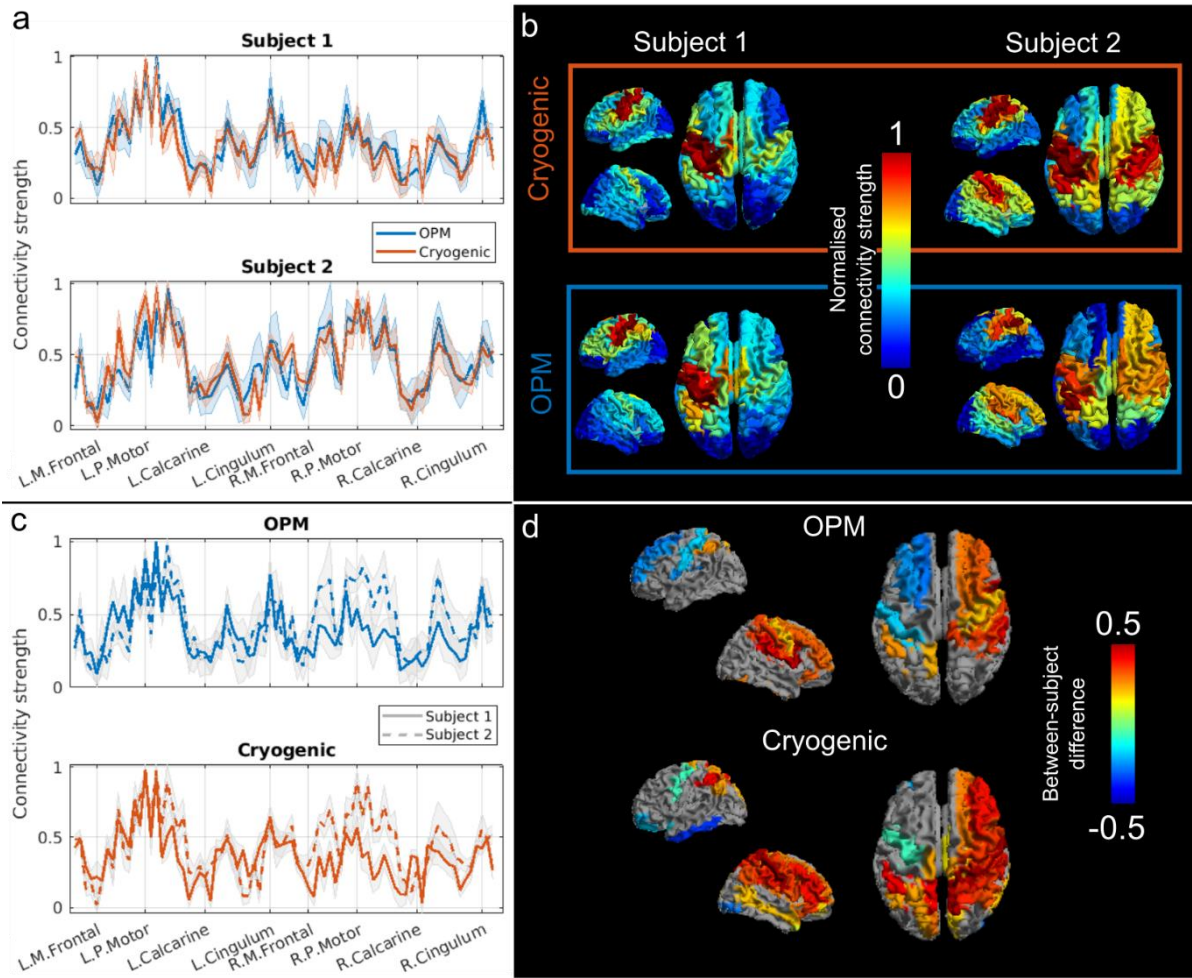

1

2 **Figure 4: Connectivity strength in the beta band.** a) Normalised connectivity strength recorded using cryogenic-  
3 (red) and OPM- (blue) derived data. Values are plotted for all 78 AAL regions, for participants 1 (top) and 2 (bottom).  
4 The shaded area represents standard deviation across 6 runs. Note the similarities between cryogenic and OPM  
5 plots. b) Normalised connectivity strength plotted on the brain surface for both subjects and both systems. c) Same  
6 as (a) but grouped by scanner type: normalised connectivity strength recorded using cryogenic- (bottom) and OPM-  
7 (top) derived data for participants 1 (solid line) and 2 (dashed line). d) Brain areas showing significant difference  
8 between participants (grey indicates no significant difference). Note both systems highlight similar regions.

### 9 3.2 Resting-state connectivity

10 Results from the resting-state OPM-MEG connectivity study are shown in Figure 5. Group-  
11 average connectivity matrices in the alpha (panel a) and beta (panel b) bands are plotted.  
12 The 3D brain plots show dominant connections between AAL regions (connections which  
13 lie within 20 % of the maximum). Differences between alpha- and beta-band connectomes  
14 are clear; alpha oscillations support connections between occipital and motor regions (with  
15 some frontal projections), whilst the beta-band connectome appears dominated by a  
16 sensorimotor network.

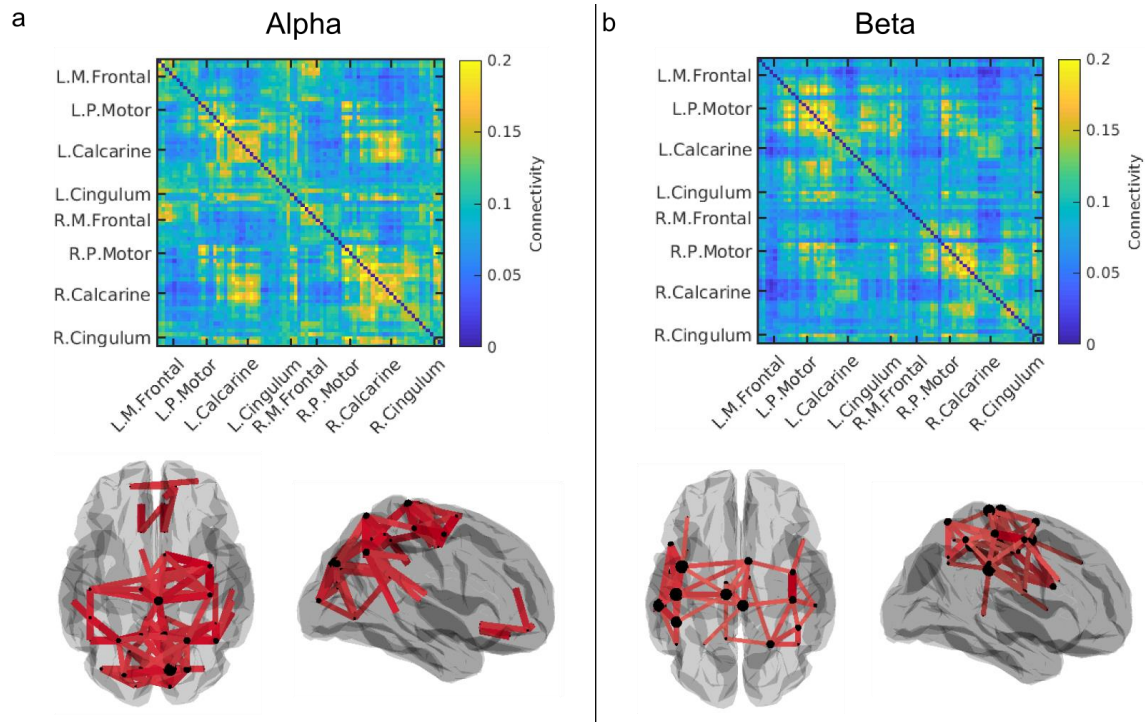

1

2 **Figure 5: Resting-state connectivity plots derived from OPM data.** Alpha- (a) and beta- (b) band connectivity  
3 matrices averaged across the 7 participants. Brain surfaces show the connections within 20 % (alpha) and 30 %  
4 (beta) of the maximum value.

5 Resting-state connectivity results, derived from cryogenic data, are plotted in Figure 6.  
6 Panels a and b show alpha- and beta-band connectivity matrices, respectively. In each  
7 panel, 9 different matrices are shown: these correspond to the 9 (randomly selected)  
8 groups of 7 subjects. Colour bars are the same for all matrices. The 3D brains show  
9 dominant connections (within 30 % of the maximum connectivity value). (These are  
10 derived from the grand average across 63 subjects.) Here we see that alpha oscillations  
11 mediate connections primarily in occipital areas whilst the beta-band connectome shows  
12 a more widespread connectivity, between occipital and parietal regions. Interestingly,  
13 whilst a common structure exists across all groups, in both bands, there is large  
14 discrepancy between connectivity strength values across groups.

15 Figure 6c shows a comparison between cryogenic- and OPM-derived resting-state  
16 connectomes. The upper and lower rows show results for alpha and beta bands,  
17 respectively. In the scatter plots, we show resting-state connectivity values from different  
18 groups of people, plotted against each other. In the left-hand scatter plot, 36 different  
19 comparisons are made, corresponding to 36 available pairs within our 9-group connectivity  
20 matrices. The black line shows  $y = x$  and, given that the points represent connectivity  
21 values derived using the same system, for the same connections, in different subject  
22 groups, we would expect to see a scatter around this line. This is broadly the case,

1        however it is important to note how wide the variation around this line is. This reflects  
2        differences between subjects. The middle scatter plot contains 9 comparisons. Here, our  
3        group-averaged OPM-derived connectivity values are plotted against equivalent values for  
4        each of the 9 cryogenic group averages. Note here that for both the alpha and beta band,  
5        although data do not necessarily lie along the ' $y = x$ ' line, a very clear linear trend is  
6        observed.

7        Finally, the right-hand bar chart shows correlation values between group-level  
8        connectomes; the left-hand bar shows cryogenic vs cryogenic connectomes; the right-  
9        hand bar shows OPM vs cryogenic connectomes. The bars show averages, whilst all data  
10       contributing to those averages are shown overlaid as squares/triangles. Here we see a  
11       clear result; if our OPM system was not able to successfully measure resting-state  
12       connectivity, we would expect the OPM vs cryogenic comparison to be significantly lower  
13       than the cryogenic vs cryogenic comparison. However, whilst the average is slightly lower,  
14       this effect is not significant, and overall it is clear that there is similarity between OPM-  
15       derived and cryogenic-derived resting-state functional connectivity measurements.



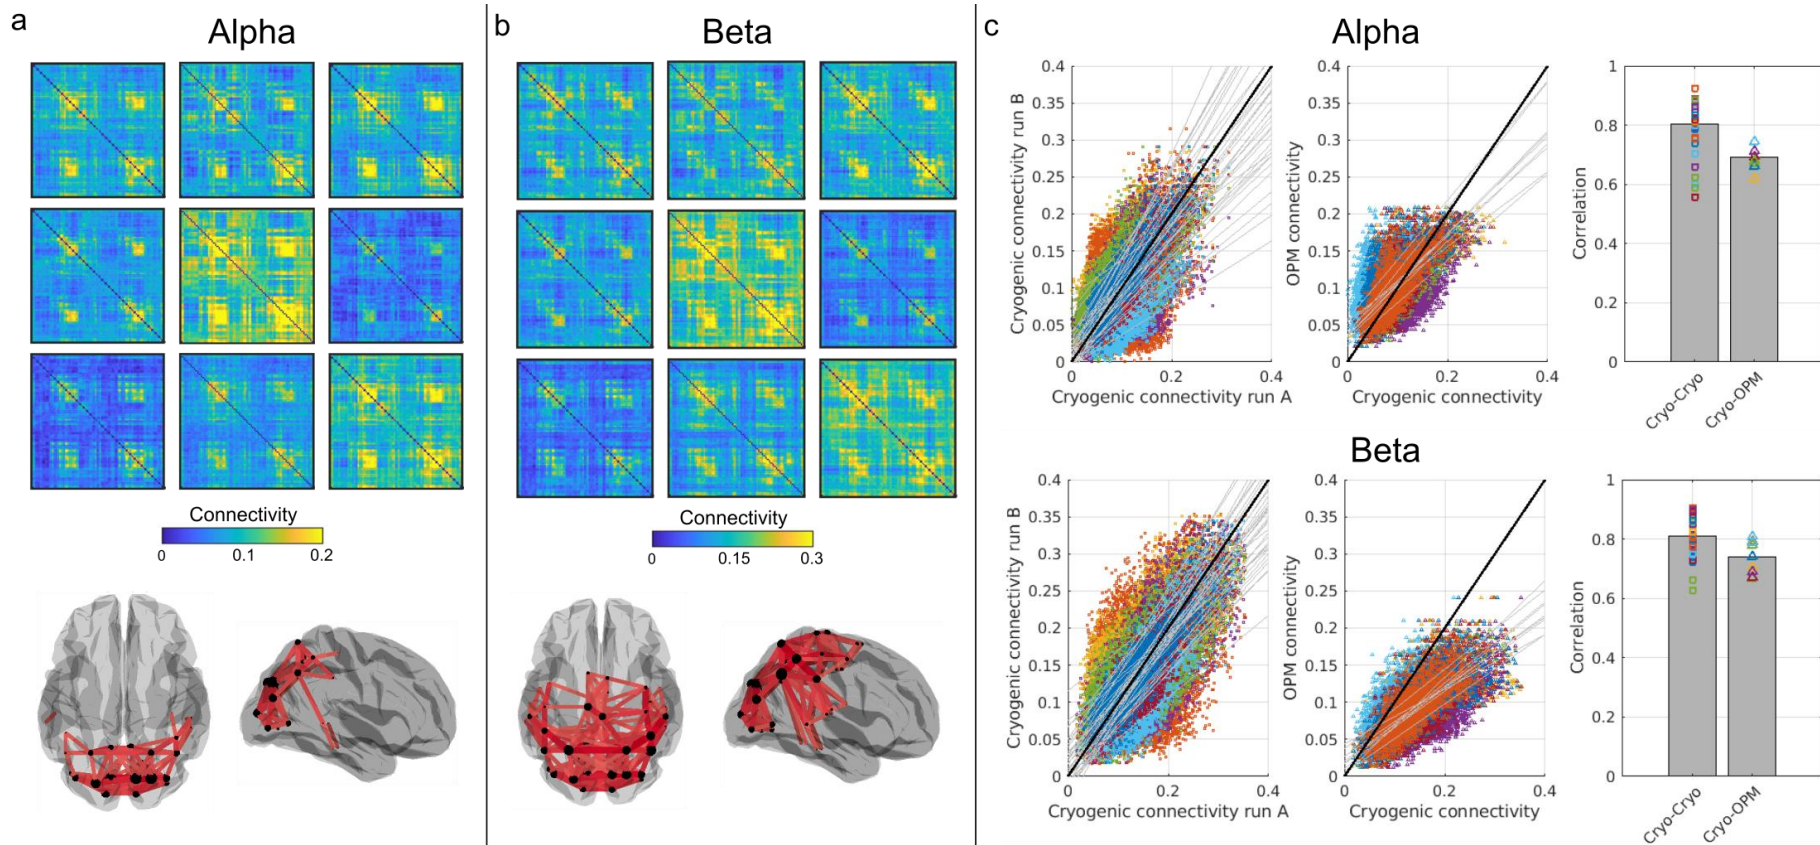

1

2 **Figure 6: Resting-state group connectivity matrices from cryogenic data and a comparison with the OPM-derived connectome.** Alpha- (a) and beta- (b) band connectivity  
3 matrices from 9 groups of 7 subjects. 3D brain plots show dominant connections (within 30 % of the maximum value). Note that even though these are group averaged results,  
4 clear difference across groups remain (although the overall pattern appears robust). c) The scatter plots on the left show cryogenic-derived connectivity values, with different  
5 groups plotted against each other i.e. each data point shows connectivity for the same connection, in two different subject groups, plotted against each other. The black line  
6 shows  $y=x$ ; the coloured lines show lines of best fit for the 36 different possible comparisons between independent groups. The scatter plots in the centre show cryogenic-derived  
7 connectivity versus OPM-derived connectivity values. 9 separate comparisons are made between the OPM-derived connectome (averaged across 7 subjects) and 9 separate  
8 cryogenic-derived connectomes (each the average of 7 subjects). The bar plot shows mean correlation values for cryogenic-to-cryogenic connectivity (left-hand bar) and OPM-  
9 to-cryogenic connectivity (right-hand bar). Note that the scatter of points is relatively similar indicating good agreement between OPM- and cryogenic- derived resting-state  
10 connectivity.

## 1 4 Discussion

2 OPMs represent a step change for MEG instrumentation: OPM-MEG offers the  
3 potential for cheaper MEG systems which can ultimately come into more widespread use,  
4 particularly in clinical settings. Wearable helmets mean that sensors move with the head,  
5 removing worries around subject movement which can lead to data becoming unusable in  
6 cryogenic systems (Boto et al., 2018). Flexible placement of small and lightweight sensors  
7 means that, in principle, an OPM-MEG system can adapt to any head shape or size (Hill et  
8 al., 2020). Ultimately this means that OPM-based systems are better able to accommodate  
9 challenging patient groups, in particular children (with smaller heads) or subject groups who  
10 find it hard to keep sufficiently still in a conventional scanning environment. The ability to move  
11 whilst scanning opens up new possibilities for neuroscientific experiment – for example we  
12 can scan people as they undertake naturalistic tasks (Hill et al., 2019) or become immersed  
13 in a virtual environment (Roberts et al., 2019). Finally, because OPM sensors can get closer  
14 to the brain, we can capture better data with higher sensitivity and spatial resolution (Boto et  
15 al., 2019, 2016; Iivanainen et al., 2017). These factors point towards OPMs superseding  
16 cryogenic MEG devices in the coming years. However, the technology remains largely  
17 unproven, and it is critical that OPM-MEG systems begin to demonstrate that they can perform  
18 at least as well as cryogenic systems for important neuroscientific measurements.

19 Functional connectivity is an area that has become of great importance in recent years.  
20 Canonical networks, and the functional connectivities that underlie them, are fundamental to  
21 healthy brain function and have been shown to be perturbed in a number of abnormalities  
22 ranging from mental health disorders that strike in the very young, to neurodegenerative  
23 conditions that become a problem for the elderly. The combination of high spatial and temporal  
24 resolution makes MEG, arguably, the technique of choice for measurement of brain network  
25 activity and connectivity. This is particularly true for the measurement of dynamic connectivity  
26 (e.g. during a task) where we might aim to probe the formation and dissolution of transient  
27 networks as they modulate to support cognition. It is for these reasons that functional  
28 connectivity and network measurement represent a key part of MEG research. Consequently,  
29 showing that OPM-MEG systems are capable of such measurements, with similar fidelity to  
30 conventional devices, is a key step forward in the journey towards a viable OPM-MEG device.

31 Here, we aimed to show that OPM-MEG could indeed offer complete characterisation  
32 of the brain-wide functional connectome. As noted in our introduction, such demonstration  
33 relies not only on high fidelity (unaveraged) MEG data but also on whole brain coverage and  
34 high spatial specificity; given the limited number of channels in OPM-MEG systems (~50

1 compared to ~300 in cryogenic systems) these latter points could have posed a challenge.  
2 However, results show that 50-channel OPM-MEG, in combination with accurate co-  
3 registration procedures and an appropriate source localisation algorithm, can indeed measure  
4 functional connectivity with similar efficacy to a cryogenic system.

5 Our task-based connectivity demonstration showed that both cryogenic- and OPM-  
6 MEG yield robust networks in the alpha, beta and gamma bands in response to a visuo-motor  
7 paradigm. Of interest here is the ability to measure individual differences between subjects.  
8 We showed that, in the beta band, both systems measured a robust sensori-motor network  
9 which exhibited significantly more bilateral connectivity in subject two, compared to subject 1.  
10 Of course, the reason for these differences between subjects is unclear, but the fact that the  
11 same (significant) differences were observed using both cryogenic and OPM-MEG is  
12 compelling. We argue that this finding is important for two reasons. First, from an OPM-MEG  
13 point of view, it validates the fact that the MEG data are of high quality; indeed the ability to  
14 “tell which subject you are scanning” based only on the MEG data is a satisfying demonstration  
15 of the equivalence between OPM and cryogenic derived data. Second, more broadly, this  
16 finding demonstrates the importance of inter-individual differences. It is rare in the MEG  
17 literature that single subjects are scanned multiple times; more usually, large subject groups  
18 containing tens or hundreds of subjects from different ‘groups’ are scanned and differences  
19 between those groups sought. Here, we show that sizeable differences between healthy  
20 individuals can be robustly observed in MEG data and it is tempting to speculate that these  
21 differences are larger than the more subtle deviations that are often observed between groups.  
22 It follows that future study should take this into account. Indeed, given the robustness of the  
23 within-subject measures that we observe here, it is likely that acquisition of longitudinal  
24 measures, tracking how e.g. a patient’s brain changes throughout the course of an illness,  
25 may ultimately be more fruitful (and more useful clinically) than cross sectional group studies.

26 In many ways, our resting-state data posed a greater challenge for OPM-MEG  
27 compared to task-based data, for the simple reason that the task-based connectome could be  
28 averaged over trials, potentially masking the effect of any artefacts at the sensor level.  
29 Conversely, resting state connectivity must be inferred based on unaveraged data, meaning  
30 that sensor artefacts could have a greater influence. Our findings showed that similar resting  
31 state network structure could be elucidated both using cryogenic and OPM-based MEG. Our  
32 beta band analyses showed that, when considering a group result across 7 subjects,  
33 cryogenic-derived connectome matrices showed 80% correlation; when comparing OPM and  
34 cryogenic derived connectomes, this was reduced marginally to 74%. In the alpha band, this  
35 reduction was somewhat larger with 80% correlation for cryogenic derived connectomes

1 reducing to 68% for OPM-cryogenic comparison. These reductions are not surprising  
2 considering the vast differences between the systems – in particular the channel count.  
3 However, in both cases the reduction was not statistically significant. Indeed, when looking at  
4 the range of correlation values across different subject groups, these reductions were small  
5 and could easily be due to differences in the groups of participants scanned. These data,  
6 coupled with our task-based results, therefore show that OPM-MEG, even with a modest  
7 number of sensors, is able to effectively characterise the human connectome.

8         These resting state results are somewhat surprising: given the fact that OPMs are  
9 configured as magnetometers, as distinct from gradiometers, we might expect a higher degree  
10 of interference in our OPM compared to our cryogenic data. Consequently, one might expect  
11 a drop in fidelity of the connectivity assessment, particularly for the resting state where no  
12 averaging is possible. In fact, further analysis showed that magnetic artefacts of no interest  
13 are present in OPM-MEG sensor level data, however, using beamforming these artefacts are  
14 likely to be eliminated very efficiently. (See appendix, where the magnetic artefact of the heart  
15 has been close to be eliminated via beamforming.) This is an important point; it is hard to  
16 imagine how one might efficiently form an efficient gradiometer-based system from OPMs.  
17 Axial gradiometers would require OPMs to be stacked on top of one another, making the  
18 wearable helmet bulky and probably impractical. Planar gradiometers are possible to form and  
19 have been shown to be effective (Hill et al., 2019), however this involves a digital subtraction  
20 of signals from two adjacent OPMs which means (assuming a simple Gaussian model) a likely  
21  $\sqrt{2}$  increase in sensor noise. With this in mind, it is positive that mechanisms such as  
22 beamforming work well. It remains to be seen as to whether other interference rejection  
23 strategies (for example signal source separation; (Taulu and Simola, 2006)) are also effective,  
24 but as shown in our appendix, effective interference minimisation will be extremely important  
25 for future OPM-MEG connectivity metrics.

26         Whilst OPM- and cryogenic-derived connectomes were largely similar, there are some  
27 differences which are worth noting. First, both in resting and task-positive connectivity, we  
28 noted generally weaker occipital connections for the OPM system. This is evident in Figure 2,  
29 where gamma-band results are noisier in the OPM system. It is also apparent in the resting-  
30 state measurements where the cryogenic system demonstrated higher occipital connectivity  
31 in alpha and beta bands. The reason for this difference is unclear, however we speculate that  
32 it results from the way in which the MEG helmet was fitted. The additively-manufactured  
33 helmet was a good fit for most subjects over the top of the head, but a noticeable gap (of ~1–  
34 2 cm) exists across the back of the head. This gap acts to move sensors away from occipital  
35 lobe and, consequently, signals will diminish in accordance with an inverse square law. In



1 contrast, in a cryogenic MEG system most subjects tend to rest their head on the back of the  
2 scanner, meaning occipital lobe has the best coverage (and, correspondingly, frontal cortices  
3 the worst). It is therefore likely that a better fitting helmet (for example with sensor mounts that  
4 enable a degree of movement in the radial direction) would offer improved performance for  
5 OPM-based connectivity measures. Related to this, the alpha band resting state connectivity  
6 matrix showed higher connectivity in frontal regions for OPMs. Again this could be a proximity  
7 effect: a recent study by Coquelet et al., (2020) showed that electroencephalography (EEG)  
8 offered higher frontal cortex connectivity compared to (conventional) MEG and they cited an  
9 increased gap between the sensors and the brain in MEG, in frontal regions, as the reason.  
10 Our OPM system likely brings sensors closer to frontal cortices and this could explain the  
11 increased sensitivity to frontal alpha connectivity. What is clear is that inhomogeneous brain-  
12 to-sensor spacing for different areas of cortex can have a marked effect on results and this  
13 effect must be taken into account in future generations of scanner design. One potential  
14 solution is to use individual scanner-casts, however these tend to be difficult and time-  
15 consuming to generate and are expensive. The introduction of more sophisticated helmets  
16 that allow a degree of adaptation to different head shapes (e.g. by including built-in facility to  
17 adjust sensor positions along the radial direction), could negate this problem.

## 18 **5 Conclusion**

19 In conclusion, our study has shown that OPM-MEG can measure whole-brain functional  
20 connectivity with a fidelity similar to that demonstrated by conventional cryogenic MEG  
21 machines. In the resting state, our results show that connectome matrices from OPM and  
22 cryogenic systems exhibit an extremely high degree of similarity, with correlation values >70  
23 %. This value is not measurably different to the correlation observed between connectomes  
24 measured across different subject groups on a single cryogenic MEG device. In a task-based  
25 study, we showed that robust differences in connectivity between individuals (scanned  
26 multiple times) exist, and similar individualised features could be identified in cryogenic and  
27 OPM-MEG measurements, again demonstrating the fidelity of OPM-MEG data. OPMs offer a  
28 step change for MEG instrumentation, however OPM-MEG remains a nascent technology with  
29 significant work still to be done. The present demonstration takes us one step closer to routine  
30 use of OPM-MEG for neuroscientific measurement. This adds weight to the argument that  
31 OPMs will ultimately supersede cryogenic-based instrumentation.

## 1 **Acknowledgements**

2 We express our sincere thanks to collaborators at the Wellcome Centre for Human  
3 Neuroimaging, University College London, UK for extremely helpful discussions and ongoing  
4 support. Special thanks to Benjamin A.E. Hunt, who collected data from the 63 subjects as  
5 part of the UK MEG partnership programme, which we used here for comparison with OPM  
6 data. This work was supported by the UK Quantum Technology Hub in Sensing and Timing,  
7 funded by the Engineering and Physical Sciences Research Council (EPSRC)  
8 (EP/T001046/1), and a Wellcome Collaborative Award in Science (203257/Z/16/Z and  
9 203257/B/16/Z) awarded to Gareth R. Barnes, RB and MJB.

10

## 11 **Conflicts of interest**

12 V.S. is the founding director of QuSpin, the commercial entity selling OPM magnetometers.  
13 E.B. and M.J.B. are directors of Cerca Magnetics, a newly established spin-out company  
14 whose aim is to commercialise aspects of OPM-MEG technology.

## 1 **Appendix - External interference and its influence on OPM data**

2 A major concern related to connectivity measurement using OPM-MEG is the influence of  
3 external magnetic interference. As outlined in our introduction, most cryogenic MEG systems  
4 employ gradiometers to reduce the effect of external magnetic fields. Some also use reference  
5 arrays, higher-order synthetic gradiometry (Vrba and Robinson, 2001), or software  
6 approaches (Taulu and Simola, 2006). However, OPMs are inherently formed as  
7 magnetometers and this means that interference is more problematic. This is a particular  
8 concern for connectivity measures (in the resting state) since averaging across trials is  
9 impossible. Thus, understanding how OPM data is influenced by interference is important.

10 A good example of interference from a distal source is the magnetic artefact from the heart.  
11 Even at a distance, the field from the heart is many times larger than the field from the brain.  
12 Also, the fundamental frequencies of the heartbeat overlap with the frequency bands of  
13 interest for connectivity (i.e. the alpha and beta ranges). Consequently, this poses a significant  
14 challenge since, if the heartbeat artefact appears across many sensors, and is projected (via  
15 source localisation) into brain space, this will necessarily inflate functional connectivity  
16 measurement. For these reasons, we aimed to test the extent to which the heartbeat artefact  
17 is found in source-localised OPM-MEG data.

### 18 **Methods**

19 In order to probe the presence of a heartbeat artefact in OPM-MEG resting-state data,  
20 independent component analysis (ICA) was applied to beta-band filtered sensor-level data.  
21 ICA was applied in the temporal dimension using the fastICA algorithm (Hyvärinen, 1999); we  
22 selected a sufficient number of independent components to explain 95 % of the data variance.  
23 This procedure was applied to data from all 7 subjects independently. For one subject, a clear  
24 heartbeat artefact was contained within a single independent component. For the other 6  
25 subjects, the heartbeat was split across two independent components.

26 Following this, for all subjects we re-ran the beamformer spatial filter in order to reconstruct  
27 source-space data at the 78 pre-selected AAL regions. This was done in two different ways:

28 1) Following ICA, data were reconstructed with the heartbeat artefact removed (by  
29 removing either 1 or 2 independent components). The data covariance matrix was  
30 derived based on these reduced data, and a beamformer applied. Note that component  
31 removal in this way necessitates the application of matrix regularisation and so this  
32 was applied, using the Tikhonov method, with a regularisation parameter equal to  
33 0.001 times the maximum singular value of the unregularised matrix.

1        2) Beamforming was applied without removal of the heartbeat artefact. This was done  
2        with no regularisation (as in our main manuscript) as well as with regularisation  
3        parameters equal to 5 % and 15 % of the maximum singular value of the unregularised  
4        matrix. (Note, the addition of regularisation reduces the ability of the beamformer to  
5        suppress external magnetic interference, and consequently this proves a useful marker  
6        of how other source localisation algorithms (e.g. a dipole fit) might behave.)

7        In both cases we correlated the ICA-derived heartbeat to the source-localised MEG data in  
8        order to assess the influence of interference.

## 9        **Results and discussion**

10        Figure A1a shows representative beta-band filtered OPM-MEG data at the channel level. Data  
11        for four channels, for a single subject, are shown and we see that the beta-band component  
12        of the heartbeat is easily identified. Figure A1 shows the cortical topography of correlation with  
13        the heartbeat artefact following source localisation. In the top left, we show the case where  
14        the heartbeat artefact was removed. The top right, bottom left, and bottom right show the case  
15        for a beamformer with zero, 5 % and 15 % regularisation respectively. As expected, heartbeat  
16        correlation is zero in the case where the heartbeat has been removed (a simple consequence  
17        of ICA). More importantly, correlation is very close to zero ( $0.03 \pm 0.02$  (mean  $\pm$  standard  
18        deviation across all 78 regions)) when an unregularised beamformer is applied. As  
19        regularisation is increased, correlation increases markedly (to  $0.06 \pm 0.04$  and  $0.11 \pm 0.06$  for  
20        5 % and 15 % regularisation, respectively). Note that correlation is most pronounced for  
21        deeper regions.

22        It is clear from this result that the good performance of OPM-MEG in connectivity assessment  
23        that we see in our manuscript is due, at least in part, to the noise rejection characteristics of  
24        the beamformer. In cases where beamforming is less efficacious, artefacts begin to leak into  
25        source-space data and as a consequence, connectivity measurement (or indeed any  
26        assessment of neural oscillatory processes) would become contaminated. Of course, the  
27        artefact as defined here can also be removed by other techniques (e.g. ICA – as  
28        demonstrated) but this relies on *a-priori* artefact identification. This was easy for the temporally  
29        well-characterised heartbeat, but is significantly harder for less well-known sources of  
30        magnetic interference. On the other hand, the beamformer does not rely on *a-priori*  
31        assumptions. Further, if it works well on the heartbeat, we can assume it works equally well in  
32        nulling other sources of external magnetic interference. In conclusion, we recommend that  
33        beamforming (or at least adaptive source-localisation techniques with good interference

- 1 rejection properties) are used when attempting to assess source-space functional connectivity
- 2 using OPM-MEG.

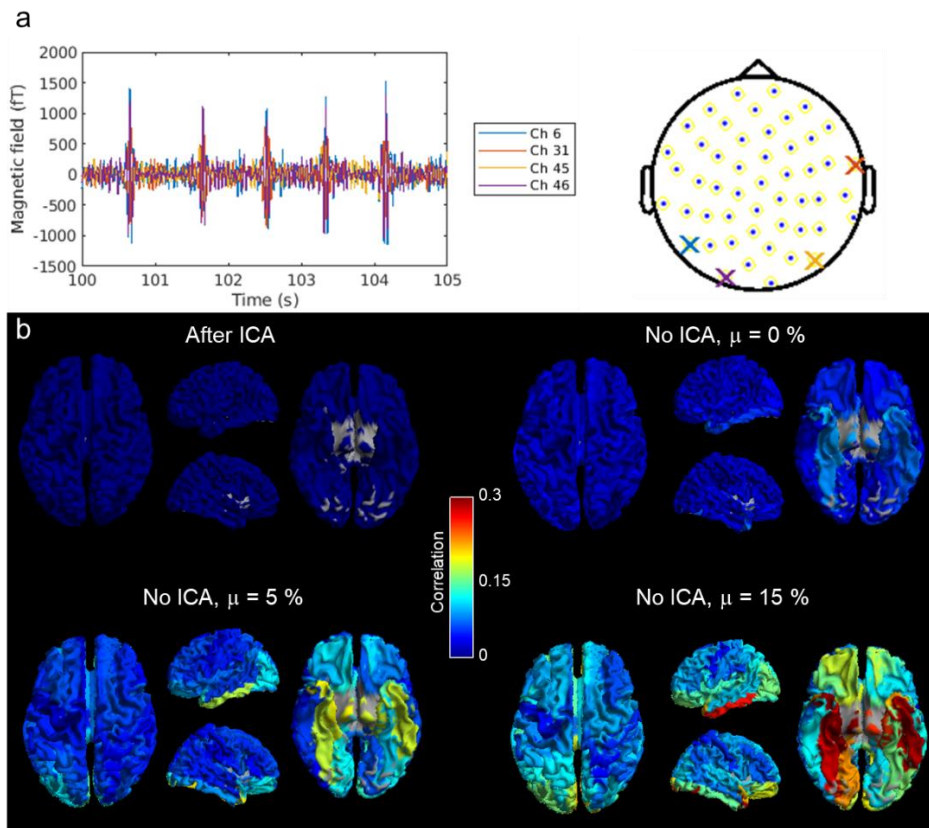

3

4 **Figure A1: Presentation of the heartbeat artefact in OPM-MEG:** a) Sensor-space data filtered to the beta band.  
5 Four channels are shown (indicated on the sensor layout on the right) and despite the separation of approximately  
6 40 cm between the heart itself and the head-mounted sensors, the magnetocardiogram can be seen clearly. b)  
7 Correlation between the heartbeat artefact and source-localised data, across 78 AAL regions. Top left:  
8 Beamforming applied with the cardiac artefact removed. Top right: Beamforming applied to the full dataset with no  
9 regularisation. Bottom left: Beamforming applied with 5 % regularisation. Bottom right: Beamforming applied with  
10 15 % regularisation.

11

## 1 **References**

- 2 Altarev, I., Fierlinger, P., Lins, T., Marino, M.G., Nießen, B., Petzoldt, G., Reisner, M.,  
3 Stuber, S., Sturm, M., Taggart Singh, J., Taubenheim, B., Rohrer, H.K., Schläpfer, U.,  
4 2015. Minimizing magnetic fields for precision experiments. *J. Appl. Phys.* 117.  
5 <https://doi.org/10.1063/1.4922671>
- 6 Baker, A.P., Brookes, M.J., Rezek, I.A., Smith, S.M., Behrens, T., Smith, P.J.P., Woolrich,  
7 M., 2014. Fast transient networks in spontaneous human brain activity. *Elife* 2014,  
8 e01867. <https://doi.org/10.7554/eLife.01867>
- 9 Barry, D.N., Tierney, T.M., Holmes, N., Boto, E., Roberts, G., Leggett, J., Bowtell, R.,  
10 Brookes, M.J., Barnes, G.R., Maguire, E.A., 2019. Imaging the human hippocampus  
11 with optically-pumped magnetoencephalography. *Neuroimage* 203.  
12 <https://doi.org/10.1016/j.neuroimage.2019.116192>
- 13 Beckmann, C.F., DeLuca, M., Devlin, J.T., Smith, S.M., 2005. Investigations into resting-  
14 state connectivity using independent component analysis. *Philos. Trans. R. Soc. B Biol.*  
15 *Sci.* 360, 1001–1013. <https://doi.org/10.1098/rstb.2005.1634>
- 16 Benjamini, Y., Hochberg, Y., 1995. Controlling the False Discovery Rate: A Practical and  
17 Powerful Approach to Multiple Testing. *J. R. Stat. Soc. Ser. B.*  
18 <https://doi.org/10.1111/j.2517-6161.1995.tb02031.x>
- 19 Biswal, B., Zerrin Yetkin, F., Haughton, V.M., Hyde, J.S., 1995. Functional connectivity in the  
20 motor cortex of resting human brain using echo-planar mri. *Magn. Reson. Med.* 34,  
21 537–541. <https://doi.org/10.1002/mrm.1910340409>
- 22 Borna, A., Carter, T.R., Colombo, A.P., Jau, Y.Y., McKay, J., Weisend, M., Taulu, S.,  
23 Stephen, J.M., Schwindt, P.D.D., 2020. Non-invasive functional-brain-imaging with an  
24 OPM-based magnetoencephalography system. *PLoS One* 15.  
25 <https://doi.org/10.1371/journal.pone.0227684>
- 26 Boto, E., Bowtell, R., Krüger, P., Fromhold, T.M., Morris, P.G., Meyer, S.S., Barnes, G.R.,  
27 Brookes, M.J., 2016. On the potential of a new generation of magnetometers for MEG:  
28 A beamformer simulation study. *PLoS One* 11, e0157655.  
29 <https://doi.org/10.1371/journal.pone.0157655>
- 30 Boto, E., Holmes, N., Leggett, J., Roberts, G., Shah, V., Meyer, S.S., Muñoz, L.D., Mullinger,  
31 K.J., Tierney, T.M., Bestmann, S., Barnes, G.R., Bowtell, R., Brookes, M.J., 2018.

- 1 Moving magnetoencephalography towards real-world applications with a wearable  
2 system. *Nature* 555, 657–661. <https://doi.org/10.1038/nature26147>
- 3 Boto, E., Holmes, N., Tierney, T.M., Leggett, J., Hill, R., Mellor, S., Roberts, G., Barnes,  
4 G.R., Bowtell, R., Brookes, M.J., Boto, E., Holmes, N., Tierney, T.M., Leggett, J., Hill,  
5 R., Mellor, S., Roberts, G., Barnes, G.R., Bowtell, R., Brookes, M.J., 2020.  
6 Magnetoencephalography Using Optically Pumped Magnetometers, in: *Fifty Years of*  
7 *Magnetoencephalography*. Oxford University Press, New York, pp. 104–124.  
8 <https://doi.org/10.1093/oso/9780190935689.003.0008>
- 9 Boto, E., Meyer, S.S., Shah, V., Alem, O., Knappe, S., Kruger, P., Fromhold, T.M., Lim, M.,  
10 Glover, P.M., Morris, P.G., Bowtell, R., Barnes, G.R., Brookes, M.J., 2017. A new  
11 generation of magnetoencephalography: Room temperature measurements using  
12 optically-pumped magnetometers. *Neuroimage* 149, 404–414.  
13 <https://doi.org/10.1016/j.neuroimage.2017.01.034>
- 14 Boto, E., Seedat, Z.A., Holmes, N., Leggett, J., Hill, R.M., Roberts, G., Shah, V., Fromhold,  
15 T.M., Mullinger, K.J., Tierney, T.M., Barnes, G.R., Bowtell, R., Brookes, M.J., 2019.  
16 Wearable neuroimaging: Combining and contrasting magnetoencephalography and  
17 electroencephalography. *Neuroimage* 201.  
18 <https://doi.org/10.1016/j.neuroimage.2019.116099>
- 19 Bright, M.G., Whittaker, J.R., Driver, I.D., Murphy, K., 2020. Vascular physiology drives  
20 functional brain networks. *Neuroimage* 217.  
21 <https://doi.org/10.1016/j.neuroimage.2020.116907>
- 22 Brookes, M.J., Vrba, J., Robinson, S.E., Stevenson, C.M., Peters, A.M., Barnes, G.R.,  
23 Hillebrand, A., Morris, P.G., 2008. Optimising experimental design for MEG  
24 beamformer imaging. *Neuroimage* 39, 1788–1802.  
25 <https://doi.org/10.1016/j.neuroimage.2007.09.050>
- 26 Brookes, M.J., Woolrich, M.W., Barnes, G.R., 2012. Measuring functional connectivity in  
27 MEG: A multivariate approach insensitive to linear source leakage. *Neuroimage* 63,  
28 910–920. <https://doi.org/10.1016/j.neuroimage.2012.03.048>
- 29 Brookes, M.J., Woolrich, M.W., Luckhoo, H., Price, D., Hale, J.R., Stephenson, M.C.,  
30 Barnes, G.R., Smith, S.M., Morris, P.G., 2011. Investigating the electrophysiological  
31 basis of resting state networks using magnetoencephalography. *Proc. Natl. Acad. Sci.*  
32 108, 16783–16788. <https://doi.org/10.1073/pnas.1112685108>



- 1 Cohen, D., 1972. Magnetoencephalography: Detection of the brain's electrical activity with a  
2 superconducting magnetometer. *Science* (80-. ). 175, 664–666.  
3 <https://doi.org/10.1126/science.175.4022.664>
- 4 Coquelet, N., De Tiège, X., Destoky, F., Roshchupkina, L., Bourguignon, M., Goldman, S.,  
5 Peigneux, P., Wens, V., 2020. Comparing MEG and high-density EEG for intrinsic  
6 functional connectivity mapping. *Neuroimage* 210.  
7 <https://doi.org/10.1016/j.neuroimage.2020.116556>
- 8 Engel, A.K., Gerloff, C., Hilgetag, C.C., Nolte, G., 2013. Intrinsic Coupling Modes: Multiscale  
9 Interactions in Ongoing Brain Activity. *Neuron* 80, 867–886.  
10 <https://doi.org/10.1016/j.neuron.2013.09.038>
- 11 Fox, M.D., Raichle, M.E., 2007. Spontaneous fluctuations in brain activity observed with  
12 functional magnetic resonance imaging. *Nat. Rev. Neurosci.*  
13 <https://doi.org/10.1038/nrn2201>
- 14 Gross, J., Kujala, J., Hämäläinen, M.S., Timmermann, L., Schnitzler, A., Salmelin, R., 2001.  
15 Dynamic imaging of coherent sources: Studying neural interactions in the human brain.  
16 *Proc. Natl. Acad. Sci.* 98, 694–699. <https://doi.org/10.1073/pnas.98.2.694>
- 17 Hill, R.M., Boto, E., Holmes, N., Hartley, C., Seedat, Z.A., Leggett, J., Roberts, G., Shah, V.,  
18 Tierney, T.M., Woolrich, M.W., Stagg, C.J., Barnes, G.R., Bowtell, R.R., Slater, R.,  
19 Brookes, M.J., 2019. A tool for functional brain imaging with lifespan compliance. *Nat.*  
20 *Commun.* 10. <https://doi.org/10.1038/s41467-019-12486-x>
- 21 Hill, R.M., Boto, E., Rea, M., Holmes, N., Leggett, J., Coles, L.A., Papastavrou, M., Everton,  
22 S.K., Hunt, B.A.E., Sims, D., Osborne, J., Shah, V., Bowtell, R., Brookes, M.J., 2020.  
23 Multi-channel whole-head OPM-MEG: Helmet design and a comparison with a  
24 conventional system. *Neuroimage*. <https://doi.org/10.1016/j.neuroimage.2020.116995>
- 25 Hipp, J.F., Hawellek, D.J., Corbetta, M., Siegel, M., Engel, A.K., 2012. Large-scale cortical  
26 correlation structure of spontaneous oscillatory activity. *Nat. Neurosci.* 15, 884–890.  
27 <https://doi.org/10.1038/nn.3101>
- 28 Holmes, N., Leggett, J., Boto, E., Roberts, G., Hill, R.M., Tierney, T.M., Shah, V., Barnes,  
29 G.R., Brookes, M.J., Bowtell, R., 2018. A bi-planar coil system for nulling background  
30 magnetic fields in scalp mounted magnetoencephalography. *Neuroimage* 181, 760–  
31 774. <https://doi.org/10.1016/j.neuroimage.2018.07.028>

- 1 Homölle, S., Oostenveld, R., 2019. Using a structured-light 3D scanner to improve EEG  
2 source modeling with more accurate electrode positions. *J. Neurosci. Methods* 326,  
3 108378. <https://doi.org/10.1016/j.jneumeth.2019.108378>
- 4 Hoogenboom, N., Schoffelen, J.M., Oostenveld, R., Parkes, L.M., Fries, P., 2006. Localizing  
5 human visual gamma-band activity in frequency, time and space. *Neuroimage*.  
6 <https://doi.org/10.1016/j.neuroimage.2005.08.043>
- 7 Hunt, B.A.E., Tewarie, P.K., Mougín, O.E., Geades, N., Jones, D.K., Singh, K.D., Morris,  
8 P.G., Gowland, P.A., Brookes, M.J., 2016. Relationships between cortical  
9 myeloarchitecture and electrophysiological networks. *Proc. Natl. Acad. Sci.* 113,  
10 13510–13515. <https://doi.org/10.1073/pnas.1608587113>
- 11 Hutchison, R.M., Womelsdorf, T., Allen, E.A., Bandettini, P.A., Calhoun, V.D., Corbetta, M.,  
12 Della Penna, S., Duyn, J.H., Glover, G.H., Gonzalez-Castillo, J., Handwerker, D.A.,  
13 Keilholz, S., Kiviniemi, V., Leopold, D.A., de Pasquale, F., Sporns, O., Walter, M.,  
14 Chang, C., 2013. Dynamic functional connectivity: Promise, issues, and interpretations.  
15 *Neuroimage* 80, 360–378. <https://doi.org/10.1016/j.neuroimage.2013.05.079>
- 16 Hyvärinen, A., 1999. Fast and robust fixed-point algorithms for independent component  
17 analysis. *IEEE Trans. Neural Networks* 10, 626–634. <https://doi.org/10.1109/72.761722>
- 18 Iivanainen, J., Stenroos, M., Parkkonen, L., 2017. Measuring MEG closer to the brain:  
19 Performance of on-scalp sensor arrays. *Neuroimage* 147, 542–553.  
20 <https://doi.org/10.1016/j.neuroimage.2016.12.048>
- 21 Iivanainen, J., Zetter, R., Parkkonen, L., 2019. Potential of on-scalp MEG: Robust detection  
22 of human visual gamma-band responses. *bioRxiv* 602342.  
23 <https://doi.org/10.1101/602342>
- 24 Johnson, C.N., Schwindt, P.D.D., Weisend, M., 2013. Multi-sensor  
25 magnetoencephalography with atomic magnetometers. *Phys. Med. Biol.* 58, 6065–  
26 6077. <https://doi.org/10.1088/0031-9155/58/17/6065>
- 27 Kamada, K., Sato, D., Ito, Y., Natsukawa, H., Okano, K., Mizutani, N., Kobayashi, T., 2015.  
28 Human magnetoencephalogram measurements using newly developed compact  
29 module of high-sensitivity atomic magnetometer. *Jpn. J. Appl. Phys.* 54, 026601.  
30 <https://doi.org/10.7567/JJAP.54.026601>
- 31 Kim, K., Begus, S., Xia, H., Lee, S.K., Jazbinsek, V., Trontelj, Z., Romalis, M. V., 2014. Multi-

- 1 channel atomic magnetometer for magnetoencephalography: A configuration study.  
2 Neuroimage 89, 143–151. <https://doi.org/10.1016/j.neuroimage.2013.10.040>
- 3 Luckhoo, H., Hale, J.R., Stokes, M.G., Nobre, A.C., Morris, P.G., Brookes, M.J., Woolrich,  
4 M.W., 2012. Inferring task-related networks using independent component analysis in  
5 magnetoencephalography. Neuroimage 62, 530–541.  
6 <https://doi.org/10.1016/j.neuroimage.2012.04.046>
- 7 Menon, V., 2011. Large-scale brain networks and psychopathology: A unifying triple network  
8 model. Trends Cogn. Sci. <https://doi.org/10.1016/j.tics.2011.08.003>
- 9 O’Neill, G.C., Bauer, M., Woolrich, M.W., Morris, P.G., Barnes, G.R., Brookes, M.J., 2015.  
10 Dynamic recruitment of resting state sub-networks. Neuroimage 115, 85–95.  
11 <https://doi.org/10.1016/j.neuroimage.2015.04.030>
- 12 Osborne, J., Orton, J., Alem, O., Shah, V., 2018. Fully integrated, standalone zero field  
13 optically pumped magnetometer for biomagnetism. Steep Dispers. Eng. Opto-Atomic  
14 Precis. Metrol. XI 10548.
- 15 Raichle, M.E., 2009. A paradigm shift in functional brain imaging. J. Neurosci.  
16 <https://doi.org/10.1523/JNEUROSCI.4366-09.2009>
- 17 Roberts, G., Holmes, N., Alexander, N., Boto, E., Leggett, J., Hill, R.M., Shah, V., Rea, M.,  
18 Vaughan, R., Maguire, E.A., Kessler, K., Beebe, S., Fromhold, M., Barnes, G.R.,  
19 Bowtell, R., Brookes, M.J., 2019. Towards OPM-MEG in a virtual reality environment.  
20 Neuroimage 199, 408–417. <https://doi.org/10.1016/j.neuroimage.2019.06.010>
- 21 Sander, T.H., Preusser, J., Mhaskar, R., Kitching, J., Trahms, L., Knappe, S., 2012.  
22 Magnetoencephalography with a chip-scale atomic magnetometer. Biomed. Opt.  
23 Express 3, 981. <https://doi.org/10.1364/BOE.3.000981>
- 24 Seedat, Z.A., Quinn, A.J., Vidaurre, D., Liuzzi, L., Gascoyne, L.E., Hunt, B.A.E., O’Neill,  
25 G.C., Pakenham, D.O., Mullinger, K.J., Morris, P.G., Woolrich, M.W., Brookes, M.J.,  
26 2020. The role of transient spectral ‘bursts’ in functional connectivity: A  
27 magnetoencephalography study. Neuroimage 209.  
28 <https://doi.org/10.1016/j.neuroimage.2020.116537>
- 29 Smith, S.M., Fox, P.T., Miller, K.L., Glahn, D.C., Fox, P.M., Mackay, C.E., Filippini, N.,  
30 Watkins, K.E., Toro, R., Laird, A.R., Beckmann, C.F., 2009. Correspondence of the  
31 brain’s functional architecture during activation and rest. Proc. Natl. Acad. Sci. U. S. A.

- 1           106, 13040–13045. <https://doi.org/10.1073/pnas.0905267106>
- 2   Taulu, S., Simola, J., 2006. Spatiotemporal signal space separation method for rejecting  
3       nearby interference in MEG measurements. *Phys. Med. Biol.* 51, 1759–1768.  
4       <https://doi.org/10.1088/0031-9155/51/7/008>
- 5   Tierney, T.M., Holmes, N., Mellor, S., López, J.D., Roberts, G., Hill, R.M., Boto, E., Leggett,  
6       J., Shah, V., Brookes, M.J., Bowtell, R., Barnes, G.R., 2019. Optically pumped  
7       magnetometers: From quantum origins to multi-channel magnetoencephalography.  
8       *Neuroimage In Press*. <https://doi.org/10.1016/j.neuroimage.2019.05.063>
- 9   Tierney, T.M., Holmes, N., Meyer, S.S., Boto, E., Roberts, G., Leggett, J., Buck, S., Duque-  
10       Muñoz, L., Litvak, V., Bestmann, S., Baldeweg, T., Bowtell, R., Brookes, M.J., Barnes,  
11       G.R., 2018. Cognitive neuroscience using wearable magnetometer arrays: Non-  
12       invasive assessment of language function. *Neuroimage* 181, 513–520.  
13       <https://doi.org/10.1016/j.neuroimage.2018.07.035>
- 14   Tzourio-Mazoyer, N., Landeau, B., Papathanassiou, D., Crivello, F., Etard, O., Delcroix, N.,  
15       Mazoyer, B., Joliot, M., 2002. Automated anatomical labeling of activations in SPM  
16       using a macroscopic anatomical parcellation of the MNI MRI single-subject brain.  
17       *Neuroimage* 15, 273–289. <https://doi.org/10.1006/nimg.2001.0978>
- 18   Vrba, J., Robinson, S.E., 2001. Signal processing in magnetoencephalography. *Methods* 25,  
19       249–271. <https://doi.org/10.1006/meth.2001.1238>
- 20   Xia, H., Ben-Amar Baranga, A., Hoffman, D., Romalis, M. V., 2006.  
21       Magnetoencephalography with an atomic magnetometer. *Appl. Phys. Lett.* 89, Article  
22       number 211104. <https://doi.org/10.1063/1.2392722>
- 23   Zetter, R., Iivanainen, J., Parkkonen, L., 2019. Optical Co-registration of MRI and On-scalp  
24       MEG. *Sci. Rep.* 9, 5490. <https://doi.org/10.1038/s41598-019-41763-4>
